# Supplementary material for: Individual Participant Data Meta-Analysis for a Binary Outcome: One-Stage or Two-Stage?
Source: PubMed Central journal article supplement (PMC3621872; doi:10.1371/journal.pone.0060650), 2013-04-09
Supplement: pone.0060650.s002.pdf [file pone.0060650.s002.pdf]

## Table S1 – Overview of the DVT datasets

All studies were obtained from dr. Geert-Jan Geersing [1, 2].

| Study | First author                  | Year | Country                  | N     | Reference used    |
|-------|-------------------------------|------|--------------------------|-------|-------------------|
| 1     | AMUSE study <sup>†</sup>      | 2009 | The Netherlands          | 1 028 | CUS               |
| 2     | R.E.G. Schutgens (AIDA study) | 2003 | The Netherlands          | 814   | CUS               |
| 3     | D.R. Anderson (EDIT study)    | 2000 | Canada                   | 153   | CUS or venography |
| 4     | R.A. Kraaijenhagen            | 2002 | The Netherlands          | 1 756 | CUS               |
| 5     | D.B. Toll <sup>†</sup>        | 2006 | The Netherlands          | 791   | CUS               |
| 6     | D.R. Anderson (EDITED study)  | 2002 | Canada                   | 1 075 | CUS or venography |
| 7     | C. Kearon                     | 2001 | Canada                   | 429   | CUS or venography |
| 8     | J.L. Elf                      | 2009 | Sweden                   | 325   | CUS or venography |
| 9     | R. Oudega <sup>†</sup>        | 2005 | The Netherlands          | 1 295 | CUS               |
| 10    | S.M. Stevens                  | 2004 | United States of America | 436   | CUS               |
| 11    | P.S. Wells (DIEM study)       | 2003 | Canada                   | 541   | CUS               |
| 12    | S.M. Bates                    | 2003 | Canada                   | 550   | CUS               |
| 13    | C. Kearon                     | 2005 | Canada                   | 809   | CUS or venography |

N = number of patients; CUS = compression ultrasonography

<sup>†</sup> These studies included only primary care patients, other studies included secondary care patients.

## References

- [1] Geersing GJ. Strategies in suspected venous thrombo-embolism in primary care. Ph.D Thesis. Universiteit Utrecht. Utrecht. The Netherlands. (ISBN 978-94-6108-210-7)
- [2] Geersing GJ, Zuithoff NPA, Kearon C, Anderson DR, Elf JL, Bates SM, Hoes AW, Janssen KJM, Kraaijenhagen RA, Oudega R, Schutgens REG, Stevens SM, Wells PS, Moons KGM. Exclusion of Deep Vein Thrombosis using the Wells rule in Primary and Secondary Care; An Individual Patient Data meta-analysis. *Submitted* 2012.
