# Supplementary material for: Individual Participant Data Meta-Analysis for a Binary Outcome: One-Stage or Two-Stage?
Source: PubMed Central journal article supplement (PMC3621872; doi:10.1371/journal.pone.0060650), 2013-04-09
Supplement: pone.0060650.s003.pdf [file pone.0060650.s003.pdf]

**Table S2 – Overview of the variables in the DVT datasets**

| <b>Variable</b> | <b>Value</b> | <b>Description</b>                         |
|-----------------|--------------|--------------------------------------------|
| studyid         | 1–13         | the study identification                   |
| sex             | 0            | female                                     |
|                 | 1            | male                                       |
| side            | 0            | side of legpain: left side                 |
|                 | 1            | side of legpain: right side                |
|                 | 2            | side of legpain: both sides                |
| malign          | 0            | no active malignancy                       |
|                 | 1            | active malignancy                          |
| par             | 0            | no paresis                                 |
|                 | 1            | paresis                                    |
| surg            | 0            | no recent surgery (or bedridden)           |
|                 | 1            | recent surgery (or bedridden)              |
| tend            | 0            | no localised tenderness deep venous system |
|                 | 1            | localised tenderness deep venous system    |
| leg             | 0            | entire leg not swollen                     |
|                 | 1            | entire leg swollen                         |
| calfdif3        | 0            | calf difference < 3 cm                     |
|                 | 1            | calf difference $\geq$ 3 cm                |
| pit             | 0            | no pitting edema                           |
|                 | 1            | pitting edema                              |
| vein            | 0            | no vein distension                         |
|                 | 1            | vein distension                            |
| altdiagn        | 0            | no alternative diagnosis present           |
|                 | 1            | alternative diagnosis present              |
| oachst          | 0            | no oral contraceptives or hst              |
|                 | 1            | oral contraceptives or hst used            |
| notraum         | 0            | leg trauma present                         |
|                 | 1            | no leg trauma present                      |
| eryt            | 0            | no erythema                                |
|                 | 1            | erythema                                   |
| histdvt         | 0            | no history of previous DVT                 |
|                 | 1            | history of previous DVT                    |
| histpe          | 0            | no history of previous PE                  |
|                 | 1            | history of previous PE                     |
| coag            | 0            | no family history of thrombophilia         |
|                 | 1            | family history of thrombophilia            |
| trav            | 0            | no prolonged traveling                     |
|                 | 1            | prolonged traveling                        |
| pregn           | 0            | not pregnant                               |
|                 | 1            | pregnant                                   |
| ddimdich        | 0            | D-dimer negative                           |
|                 | 1            | D-dimer positive                           |
| dvt             | 0            | final diagnosis of DVT: no DVT             |
|                 | 1            | final diagnosis of DVT: DVT                |
