# Supplementary material for: Individual Participant Data Meta-Analysis for a Binary Outcome: One-Stage or Two-Stage?
Source: PubMed Central journal article supplement (PMC3621872; doi:10.1371/journal.pone.0060650), 2013-04-09
Supplement: pone.0060650.s004.pdf [file pone.0060650.s004.pdf]

# Table S3 – Additional results Case Study

Estimated unadjusted factor-outcome associations for the DVT case study.

| Risk Factor        | Model              | Estimation         | $\beta$ | S.E.( $\beta$ ) | $\tau_\beta$ | $\rho_{\alpha\beta}$ | OR    | 95% CI       | 95% PI       | <i>p</i> -value |         |
|--------------------|--------------------|--------------------|---------|-----------------|--------------|----------------------|-------|--------------|--------------|-----------------|---------|
| pit ( 13 )         | $\mathfrak{h}_1+1$ | MLE                | 0.88    | 0.11            | 0.29         | -0.55                | 2.41  | 1.96 to 2.97 | 1.21 to 4.80 | < 0.001         |         |
|                    | $\mathfrak{h}_1+1$ | REML               | 0.89    | 0.11            | 0.32         | -0.55                | 2.42  | 1.95 to 3.01 | 1.16 to 5.07 | < 0.001         |         |
|                    | $\mathfrak{h}_1+2$ | MLE                | 0.87    | 0.11            | 0.30         |                      | 2.38  | 1.93 to 2.93 | 1.19 to 4.75 | < 0.001         |         |
|                    | $\mathfrak{h}_1+2$ | REML               | 0.87    | 0.11            | 0.32         |                      | 2.40  | 1.92 to 2.98 | 1.14 to 5.03 | < 0.001         |         |
|                    | $\mathfrak{h}_1+2$ | MOM                | 0.87    | 0.11            | 0.31         |                      | 2.39  | 1.93 to 2.96 | 1.17 to 4.88 | < 0.001         |         |
|                    | 3                  | MLE 1QP            | 0.87    | 0.11            | 0.30         | -0.56                | 2.44  | 1.98 to 3.01 | 1.20 to 4.96 | < 0.001         |         |
|                    | 3                  | MLE 5QP            |         |                 |              |                      |       |              |              |                 |         |
|                    | 4                  | MLE 1QP            | 0.86    | 0.10            | 0.30         |                      | 2.36  | 1.93 to 2.87 | 1.24 to 4.48 | < 0.001         |         |
|                    | 4                  | MLE 5QP            |         |                 |              |                      |       |              |              |                 |         |
|                    | 5                  | MLE 1QP            | 0.85    | 0.09            | 0.23         |                      | 2.33  | 1.95 to 2.78 | 1.36 to 4.00 | < 0.001         |         |
|                    | 5                  | MLE 5QP            |         |                 |              |                      |       |              |              |                 |         |
|                    | notraum ( 7 )      | $\mathfrak{h}_1+1$ | MLE     | 0.36            | 0.09         | 0.02                 | -1.00 | 1.44         | 1.22 to 1.70 | 1.15 to 1.81    | < 0.001 |
|                    |                    | $\mathfrak{h}_1+1$ | REML    | 0.36            | 0.09         | 0.02                 | -1.00 | 1.44         | 1.21 to 1.70 | 1.14 to 1.81    | < 0.001 |
| $\mathfrak{h}_1+2$ |                    | MLE                | 0.36    | 0.09            | 0.00         |                      | 1.43  | 1.21 to 1.69 | 1.15 to 1.78 | < 0.001         |         |
| $\mathfrak{h}_1+2$ |                    | REML               | 0.36    | 0.09            | 0.00         |                      | 1.43  | 1.21 to 1.69 | 1.15 to 1.78 | < 0.001         |         |
| $\mathfrak{h}_1+2$ |                    | MOM                | 0.36    | 0.09            | 0.00         |                      | 1.43  | 1.21 to 1.69 | 1.15 to 1.78 | < 0.001         |         |
| 3                  |                    | MLE 1QP            | 0.37    | 0.09            | 0.02         | -1.00                | 1.45  | 1.22 to 1.71 | 1.15 to 1.82 | < 0.001         |         |
| 3                  |                    | MLE 5QP            |         |                 |              |                      |       |              |              |                 |         |
| 4                  |                    | MLE 1QP            | 0.36    | 0.09            | 0.00         |                      | 1.44  | 1.22 to 1.70 | 1.15 to 1.79 | < 0.001         |         |
| 4                  |                    | MLE 5QP            |         |                 |              |                      |       |              |              |                 |         |
| 5                  |                    | MLE 1QP            | 0.36    | 0.09            | 0.00         |                      | 1.44  | 1.21 to 1.70 | 1.15 to 1.79 | < 0.001         |         |
| 5                  | MLE 5QP            |                    |         |                 |              |                      |       |              |              |                 |         |
| vein ( 13 † )      | $\mathfrak{h}_1+1$ | MLE                | 0.65    | 0.08            | 0.11         | -1.00                | 1.91  | 1.64 to 2.23 | 1.41 to 2.59 | < 0.001         |         |
|                    | $\mathfrak{h}_1+1$ | REML               | 0.65    | 0.08            | 0.12         | -1.00                | 1.91  | 1.64 to 2.23 | 1.40 to 2.61 | < 0.001         |         |
|                    | $\mathfrak{h}_1+2$ | MLE                | 0.58    | 0.07            | 0.00         |                      | 1.79  | 1.56 to 2.06 | 1.53 to 2.10 | < 0.001         |         |
|                    | $\mathfrak{h}_1+2$ | REML               | 0.58    | 0.07            | 0.00         |                      | 1.79  | 1.56 to 2.06 | 1.53 to 2.10 | < 0.001         |         |
|                    | $\mathfrak{h}_1+2$ | MOM                | 0.59    | 0.07            | 0.04         |                      | 1.80  | 1.55 to 2.08 | 1.49 to 2.17 | < 0.001         |         |
|                    | 3                  | MLE 1QP            | 0.64    | 0.08            | 0.10         | -1.00                | 1.89  | 1.62 to 2.19 | 1.42 to 2.51 | < 0.001         |         |
|                    | 3                  | MLE 5QP            |         |                 |              |                      |       |              |              |                 |         |
|                    | 4                  | MLE 1QP            | 0.58    | 0.07            | 0.00         |                      | 1.78  | 1.55 to 2.05 | 1.52 to 2.09 | < 0.001         |         |
|                    | 4                  | MLE 5QP            |         |                 |              |                      |       |              |              |                 |         |
|                    | 5                  | MLE 1QP            | 0.57    | 0.07            | 0.00         |                      | 1.78  | 1.54 to 2.04 | 1.51 to 2.08 | < 0.001         |         |
| 5                  | MLE 5QP            |                    |         |                 |              |                      |       |              |              |                 |         |
| malign ( 13 )      | $\mathfrak{h}_1+1$ | MLE                | 1.22    | 0.12            | 0.33         | -0.96                | 3.40  | 2.67 to 4.33 | 1.57 to 7.38 | < 0.001         |         |
|                    | $\mathfrak{h}_1+1$ | REML               | 1.23    | 0.13            | 0.35         | -0.94                | 3.41  | 2.65 to 4.39 | 1.50 to 7.74 | < 0.001         |         |
|                    | $\mathfrak{h}_1+2$ | MLE                | 1.18    | 0.13            | 0.33         |                      | 3.27  | 2.53 to 4.22 | 1.50 to 7.15 | < 0.001         |         |
|                    | $\mathfrak{h}_1+2$ | REML               | 1.19    | 0.14            | 0.36         |                      | 3.29  | 2.52 to 4.28 | 1.42 to 7.61 | < 0.001         |         |
|                    | $\mathfrak{h}_1+2$ | MOM                | 1.19    | 0.14            | 0.35         |                      | 3.29  | 2.52 to 4.28 | 1.43 to 7.54 | < 0.001         |         |
|                    | 3                  | MLE 1QP            | 1.22    | 0.12            | 0.33         | -0.95                | 3.38  | 2.66 to 4.30 | 1.56 to 7.32 | < 0.001         |         |
|                    | 3                  | MLE 5QP            |         |                 |              |                      |       |              |              |                 |         |
|                    | 4                  | MLE 1QP            | 1.16    | 0.13            | 0.31         |                      | 3.20  | 2.51 to 4.10 | 1.53 to 6.71 | < 0.001         |         |
|                    | 4                  | MLE 5QP            |         |                 |              |                      |       |              |              |                 |         |
|                    | 5                  | MLE 1QP            | 1.17    | 0.13            | 0.31         |                      | 3.22  | 2.51 to 4.12 | 1.54 to 6.73 | < 0.001         |         |
| 5                  | MLE 5QP            |                    |         |                 |              |                      |       |              |              |                 |         |
| histdvt ( 6 ‡ )    | $\mathfrak{h}_1+1$ | MLE                | 0.40    | 0.15            | 0.29         | -0.47                | 1.50  | 1.11 to 2.02 | 0.60 to 3.71 | 0.009           |         |
|                    | $\mathfrak{h}_1+1$ | REML               | 0.41    | 0.17            | 0.33         | -0.45                | 1.51  | 1.08 to 2.11 | 0.53 to 4.28 | 0.016           |         |
|                    | $\mathfrak{h}_1+2$ | MLE                | 0.40    | 0.16            | 0.30         |                      | 1.50  | 1.10 to 2.04 | 0.59 to 3.80 | 0.011           |         |
|                    | $\mathfrak{h}_1+2$ | REML               | 0.41    | 0.18            | 0.34         |                      | 1.51  | 1.07 to 2.14 | 0.52 to 4.43 | 0.018           |         |
|                    | $\mathfrak{h}_1+2$ | MOM                | 0.42    | 0.19            | 0.38         |                      | 1.53  | 1.05 to 2.22 | 0.47 to 5.00 | 0.026           |         |
|                    | 3                  | MLE 1QP            | 0.40    | 0.15            | 0.29         | -0.47                | 1.49  | 1.10 to 2.01 | 0.60 to 3.69 | 0.012           |         |
|                    | 3                  | MLE 5QP            |         |                 |              |                      |       |              |              |                 |         |
|                    | 4                  | MLE 1QP            | 0.39    | 0.15            | 0.28         |                      | 1.47  | 1.09 to 1.99 | 0.60 to 3.59 | 0.012           |         |
|                    | 4                  | MLE 5QP            |         |                 |              |                      |       |              |              |                 |         |
|                    | 5                  | MLE 1QP            | 0.39    | 0.15            | 0.28         |                      | 1.48  | 1.09 to 2.00 | 0.60 to 3.62 | 0.011           |         |
| 5                  | MLE 5QP            |                    |         |                 |              |                      |       |              |              |                 |         |

The number between brackets indicates the amount of available studies. Statistical significance (*p*-value), 95% confidence intervals (95% CI) and 95% prediction intervals (95% PI) are given for the odds ratio (OR). For some one-stage models, estimates could not be obtained because the adaptive Gauss-Hermite approximation did not converge.

† Zero-cells occurred in one study for factor *vein*.

‡ One study was excluded because *histdvt*=1 for all subjects.

| Risk Factor     | Model              | Estimation | $\beta$ | S.E.( $\beta$ ) | $\tau_\beta$ | $\rho_{\alpha\beta}$ | OR   | 95% CI       | 95% PI       | p-value |
|-----------------|--------------------|------------|---------|-----------------|--------------|----------------------|------|--------------|--------------|---------|
| surg ( 13 )     | $\mathfrak{h}_1+1$ | MLE        | 0.68    | 0.08            | 0.07         | -0.90                | 1.97 | 1.69 to 2.29 | 1.56 to 2.48 | < 0.001 |
|                 | $\mathfrak{h}_1+1$ | REML       | 0.67    | 0.08            | 0.04         | -0.65                | 1.96 | 1.67 to 2.30 | 1.47 to 2.63 | < 0.001 |
|                 | $\mathfrak{h}_1+2$ | MLE        | 0.65    | 0.08            | 0.04         |                      | 1.91 | 1.65 to 2.21 | 1.59 to 2.29 | < 0.001 |
|                 | $\mathfrak{h}_1+2$ | REML       | 0.65    | 0.08            | 0.09         |                      | 1.91 | 1.63 to 2.23 | 1.47 to 2.47 | < 0.001 |
|                 | $\mathfrak{h}_1+2$ | MOM        | 0.65    | 0.08            | 0.09         |                      | 1.91 | 1.63 to 2.23 | 1.46 to 2.49 | < 0.001 |
|                 | 3                  | MLE 1QP    | 0.66    | 0.08            | 0.07         | -0.77                | 1.94 | 1.67 to 2.26 | 1.53 to 2.46 | < 0.001 |
|                 | 3                  | MLE 5QP    |         |                 |              |                      |      |              |              |         |
|                 | 4                  | MLE 1QP    | 0.64    | 0.08            | 0.05         |                      | 1.89 | 1.63 to 2.20 | 1.56 to 2.30 | < 0.001 |
|                 | 4                  | MLE 5QP    |         |                 |              |                      |      |              |              |         |
|                 | 5                  | MLE 1QP    | 0.64    | 0.07            | 0.00         |                      | 1.89 | 1.64 to 2.19 | 1.61 to 2.23 | < 0.001 |
| 5               | MLE 5QP            |            |         |                 |              |                      |      |              |              |         |
| tend ( 13 )     | $\mathfrak{h}_1+1$ | MLE        | 0.56    | 0.12            | 0.35         | -0.23                | 1.75 | 1.39 to 2.21 | 0.77 to 3.99 | < 0.001 |
|                 | $\mathfrak{h}_1+1$ | REML       | 0.56    | 0.12            | 0.37         | -0.24                | 1.76 | 1.38 to 2.24 | 0.74 to 4.17 | < 0.001 |
|                 | $\mathfrak{h}_1+2$ | MLE        | 0.56    | 0.12            | 0.36         |                      | 1.76 | 1.39 to 2.23 | 0.76 to 4.05 | < 0.001 |
|                 | $\mathfrak{h}_1+2$ | REML       | 0.57    | 0.12            | 0.38         |                      | 1.76 | 1.38 to 2.25 | 0.73 to 4.22 | < 0.001 |
|                 | $\mathfrak{h}_1+2$ | MOM        | 0.57    | 0.14            | 0.42         |                      | 1.76 | 1.35 to 2.30 | 0.67 to 4.66 | < 0.001 |
|                 | 3                  | MLE 1QP    | 0.57    | 0.12            | 0.35         | -0.23                | 1.76 | 1.40 to 2.22 | 0.78 to 4.01 | < 0.001 |
|                 | 3                  | MLE 5QP    |         |                 |              |                      |      |              |              |         |
|                 | 4                  | MLE 1QP    | 0.55    | 0.12            | 0.34         |                      | 1.74 | 1.39 to 2.18 | 0.79 to 3.85 | < 0.001 |
|                 | 4                  | MLE 5QP    |         |                 |              |                      |      |              |              |         |
|                 | 5                  | MLE 1QP    | 0.56    | 0.11            | 0.31         |                      | 1.75 | 1.41 to 2.16 | 0.85 to 3.61 | < 0.001 |
| 5               | MLE 5QP            |            |         |                 |              |                      |      |              |              |         |
| leg ( 13 )      | $\mathfrak{h}_1+1$ | MLE        | 1.15    | 0.12            | 0.35         | -0.31                | 3.16 | 2.48 to 4.01 | 1.38 to 7.19 | < 0.001 |
|                 | $\mathfrak{h}_1+1$ | REML       | 1.15    | 0.13            | 0.38         | -0.31                | 3.17 | 2.47 to 4.08 | 1.32 to 7.64 | < 0.001 |
|                 | $\mathfrak{h}_1+2$ | MLE        | 1.15    | 0.12            | 0.36         |                      | 3.15 | 2.47 to 4.01 | 1.37 to 7.26 | < 0.001 |
|                 | $\mathfrak{h}_1+2$ | REML       | 1.15    | 0.13            | 0.38         |                      | 3.17 | 2.46 to 4.08 | 1.30 to 7.72 | < 0.001 |
|                 | $\mathfrak{h}_1+2$ | MOM        | 1.15    | 0.12            | 0.39         |                      | 3.17 | 2.45 to 4.10 | 1.29 to 7.83 | < 0.001 |
|                 | 3                  | MLE 1QP    | 1.15    | 0.12            | 0.36         | -0.32                | 3.17 | 2.49 to 4.04 | 1.37 to 7.33 | < 0.001 |
|                 | 3                  | MLE 5QP    |         |                 |              |                      |      |              |              |         |
|                 | 4                  | MLE 1QP    | 1.14    | 0.12            | 0.35         |                      | 3.11 | 2.46 to 3.95 | 1.37 to 7.07 | < 0.001 |
|                 | 4                  | MLE 5QP    |         |                 |              |                      |      |              |              |         |
|                 | 5                  | MLE 1QP    | 1.14    | 0.11            | 0.32         |                      | 3.12 | 2.49 to 3.91 | 1.46 to 6.64 | < 0.001 |
| 5               | MLE 5QP            |            |         |                 |              |                      |      |              |              |         |
| caldfif3 ( 13 ) | $\mathfrak{h}_1+1$ | MLE        | 1.39    | 0.08            | 0.18         | -0.35                | 4.02 | 3.44 to 4.70 | 2.60 to 6.20 | < 0.001 |
|                 | $\mathfrak{h}_1+1$ | REML       | 1.39    | 0.08            | 0.20         | -0.34                | 4.02 | 3.42 to 4.73 | 2.51 to 6.43 | < 0.001 |
|                 | $\mathfrak{h}_1+2$ | MLE        | 1.38    | 0.08            | 0.18         |                      | 3.97 | 3.39 to 4.65 | 2.56 to 6.15 | < 0.001 |
|                 | $\mathfrak{h}_1+2$ | REML       | 1.38    | 0.08            | 0.20         |                      | 3.98 | 3.38 to 4.68 | 2.48 to 6.38 | < 0.001 |
|                 | $\mathfrak{h}_1+2$ | MOM        | 1.38    | 0.08            | 0.20         |                      | 3.98 | 3.37 to 4.69 | 2.46 to 6.44 | < 0.001 |
|                 | 3                  | MLE 1QP    | 1.39    | 0.08            | 0.20         | -0.34                | 4.03 | 3.45 to 4.71 | 2.61 to 6.22 | < 0.001 |
|                 | 3                  | MLE 5QP    |         |                 |              |                      |      |              |              |         |
|                 | 4                  | MLE 1QP    | 1.38    | 0.08            | 0.17         |                      | 3.96 | 3.40 to 4.61 | 2.62 to 5.98 | < 0.001 |
|                 | 4                  | MLE 5QP    |         |                 |              |                      |      |              |              |         |
|                 | 5                  | MLE 1QP    | 1.38    | 0.07            | 0.12         |                      | 3.96 | 3.47 to 4.52 | 2.95 to 5.32 | < 0.001 |
| 5               | MLE 5QP            |            |         |                 |              |                      |      |              |              |         |
| altdiagn ( 13 ) | $\mathfrak{h}_1+1$ | MLE        | -1.35   | 0.19            | 0.63         | -0.45                | 0.26 | 0.18 to 0.38 | 0.06 to 1.11 | < 0.001 |
|                 | $\mathfrak{h}_1+1$ | REML       | -1.35   | 0.20            | 0.66         | -0.45                | 0.26 | 0.17 to 0.38 | 0.06 to 1.19 | < 0.001 |
|                 | $\mathfrak{h}_1+2$ | MLE        | -1.37   | 0.19            | 0.63         |                      | 0.25 | 0.17 to 0.37 | 0.06 to 1.09 | < 0.001 |
|                 | $\mathfrak{h}_1+2$ | REML       | -1.37   | 0.20            | 0.66         |                      | 0.25 | 0.17 to 0.38 | 0.06 to 1.16 | < 0.001 |
|                 | $\mathfrak{h}_1+2$ | MOM        | -1.37   | 0.20            | 0.64         |                      | 0.25 | 0.17 to 0.37 | 0.06 to 1.10 | < 0.001 |
|                 | 3                  | MLE 1QP    | -1.37   | 0.19            | 0.63         | -0.44                | 0.25 | 0.17 to 0.37 | 0.06 to 1.09 | < 0.001 |
|                 | 3                  | MLE 5QP    |         |                 |              |                      |      |              |              |         |
|                 | 4                  | MLE 1QP    | -1.40   | 0.19            | 0.62         |                      | 0.25 | 0.17 to 0.36 | 0.06 to 1.03 | < 0.001 |
|                 | 4                  | MLE 5QP    |         |                 |              |                      |      |              |              |         |
|                 | 5                  | MLE 1QP    | -1.40   | 0.19            | 0.62         |                      | 0.25 | 0.17 to 0.36 | 0.06 to 1.03 | < 0.001 |
| 5               | MLE 5QP            |            |         |                 |              |                      |      |              |              |         |
| sex ( 13 )      | $\mathfrak{h}_1+1$ | MLE        | 0.48    | 0.05            | 0.03         | 1.00                 | 1.62 | 1.46 to 1.80 | 1.42 to 1.85 | < 0.001 |
|                 | $\mathfrak{h}_1+1$ | REML       | 0.48    | 0.05            | 0.03         | 1.00                 | 1.62 | 1.46 to 1.80 | 1.42 to 1.85 | < 0.001 |
|                 | $\mathfrak{h}_1+2$ | MLE        | 0.50    | 0.05            | 0.00         |                      | 1.64 | 1.48 to 1.82 | 1.46 to 1.85 | < 0.001 |
|                 | $\mathfrak{h}_1+2$ | REML       | 0.50    | 0.05            | 0.00         |                      | 1.64 | 1.48 to 1.82 | 1.46 to 1.85 | < 0.001 |
|                 | $\mathfrak{h}_1+2$ | MOM        | 0.50    | 0.05            | 0.00         |                      | 1.64 | 1.48 to 1.82 | 1.46 to 1.85 | < 0.001 |
|                 | 3                  | MLE 1QP    | 0.48    | 0.05            | 0.03         |                      | 1.62 | 1.46 to 1.80 | 1.42 to 1.85 | < 0.001 |
|                 | 3                  | MLE 5QP    |         |                 |              |                      |      |              |              |         |
|                 | 4                  | MLE 1QP    | 0.50    | 0.05            | 0.00         |                      | 1.64 | 1.48 to 1.82 | 1.46 to 1.84 | < 0.001 |
|                 | 4                  | MLE 5QP    |         |                 |              |                      |      |              |              |         |
|                 | 5                  | MLE 1QP    | 0.50    | 0.05            | 0.00         |                      | 1.64 | 1.48 to 1.82 | 1.46 to 1.85 | < 0.001 |
| 5               | MLE 5QP            |            |         |                 |              |                      |      |              |              |         |

The number between brackets indicates the amount of available studies. Statistical significance ( $p$ -value), 95% confidence intervals (95% CI) and 95% prediction intervals (95% PI) are given for the odds ratio (OR). For some one-stage models, estimates could not be obtained because the adaptive Gauss-Hermite approximation did not converge.
